# Supplementary material for: Clinical Characteristics and Spermatogenesis in Patients with Congenital Hypogonadotropic Hypogonadism Caused by FGFR1 Mutations
Source: Int J Endocrinol. 2020 Nov 28;2020:8873532. doi: 10.1155/2020/8873532 (PMC7737440; doi:10.1155/2020/8873532)
Supplement: Supplementary Materials — Supplementary material 1 includes two supplementary tables: supplementary table 1 shows CHH-related genes included in the panel; supplementary table 2 shows the source analysis of FGFR1, PROKR2, ANOS1 gene mutations. Supplementary material 2 shows gene sequencing flow. [file 8873532.f1.zip]

Archive with 2 entries (2 files):
- 8873532.f1/supplementary  material 1.docx
- 8873532.f1/supplementary material 2.docx
